## RESEARCH ARTICLE

# Diagnostic accuracy of tests for type 2 diabetes and prediabetes: A systematic review and meta-analysis

Gunjeet Kaur<sup>1</sup>, P. V. M. Lakshmi<sup>1</sup>, Ashu Rastogi<sup>2</sup>, Anil Bhansali<sup>2</sup>, Sanjay Jain<sup>3</sup>, Yot Teerawattananon<sup>4,5</sup>, Henna Bano<sup>1</sup>, Shankar Prinja<sup>1\*</sup>

**1** Department of Community Medicine and School of Public Health, Post Graduate Institute of Medical Education and Research, Chandigarh, India, **2** Department of Endocrinology, Post Graduate Institute of Medical Education and Research, Chandigarh, India, **3** Department of Internal Medicine, Post Graduate Institute of Medical Education and Research, Chandigarh, India, **4** Saw Swee Hock School of Public Health, National University of Singapore, Singapore, Singapore, **5** Health Intervention Technology Assessment Program, Nonthaburi, Thailand

\* [shankarprinja@gmail.com](mailto:shankarprinja@gmail.com)

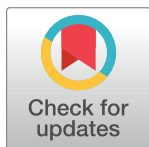

## OPEN ACCESS

**Citation:** Kaur G, Lakshmi PVM, Rastogi A, Bhansali A, Jain S, Teerawattananon Y, et al. (2020) Diagnostic accuracy of tests for type 2 diabetes and prediabetes: A systematic review and meta-analysis. PLoS ONE 15(11): e0242415. <https://doi.org/10.1371/journal.pone.0242415>

**Editor:** Stephen L. Atkin, Weill Cornell Medical College Qatar, QATAR

**Received:** November 30, 2019

**Accepted:** November 2, 2020

**Published:** November 20, 2020

**Copyright:** © 2020 Kaur et al. This is an open access article distributed under the terms of the [Creative Commons Attribution License](https://creativecommons.org/licenses/by/4.0/), which permits unrestricted use, distribution, and reproduction in any medium, provided the original author and source are credited.

**Data Availability Statement:** All relevant data are within the manuscript and its [Supporting Information](#) files.

**Funding:** This study received funding in the form of a grant (number T.11011/02/2017-HR) awarded to SP by the Department of Health Research, India. The funder had no role in the design, conduct, preparation of the manuscript, or decision to publish the present study.

**Competing interests:** The authors have declared that no competing interests exist.

## Abstract

### Aim

This systematic review aimed to ascertain the diagnostic accuracy (sensitivity and specificity) of screening tests for early detection of type 2 diabetes and prediabetes in previously undiagnosed adults.

### Methods

This systematic review included published studies that included one or more index tests (random and fasting tests, HbA1c) for glucose detection, with 75-gram Oral Glucose Tolerance Test (or 2-hour post load glucose) as a reference standard (PROSPERO ID CRD42018102477). Seven databases were searched electronically (from their inception up to March 9, 2020) accompanied with bibliographic and website searches. Records were manually screened and full text were selected based on inclusion and exclusion criteria. Subsequently, data extraction was done using standardized form and quality assessment of studies using QUADAS-2 tool. Meta-analysis was done using bivariate model using Stata 14.0. Optimal cut offs in terms of sensitivity and specificity for the tests were analysed using R software.

### Results

Of 7,151 records assessed by title and abstract, a total of 37 peer reviewed articles were included in this systematic review. The pooled sensitivity, specificity, positive (LR+) and negative likelihood ratio (LR-) for diagnosing diabetes with HbA1c (6.5%; venous sample; n = 17 studies) were 50% (95% CI: 42–59%), 97.3% (95% CI: 95.3–98.4), 18.32 (95% CI: 11.06–30.53) and 0.51 (95% CI: 0.43–0.60), respectively. However, the optimal cut-off for diagnosing diabetes in previously undiagnosed adults with HbA1c was estimated as 6.03% with pooled sensitivity of 73.9% (95% CI: 68–79.1%) and specificity of 87.2% (95% CI: 82–91%).

The optimal cut-off for Fasting Plasma Glucose (FPG) was estimated as 104 milligram/dL (mg/dL) with a sensitivity of 82.3% (95% CI: 74.6–88.1%) and specificity of 89.4% (95% CI: 85.2–92.5%).

## Conclusion

Our findings suggest that at present recommended threshold of 6.5%, HbA1c is more specific and less sensitive in diagnosing the newly detected diabetes in undiagnosed population from community settings. Lowering of thresholds for HbA1c and FPG to 6.03% and 104 mg/dL for early detection in previously undiagnosed persons for screening purposes may be considered.

## Introduction

In 2012, United Nation's resolution titled "Future We Want" recognized diabetes as a priority disease under non-communicable diseases (NCDs) and a global challenge to sustainable development [1]. Owing to its growing burden across the globe, diabetes is also part of World Health Organization Global Action Plan for NCDs [2]. To this end, the Sustainable Development Goal 3.4 target envisions to achieve one-third reduction in premature mortality from the major NCDs including diabetes by year 2030 [3]. With the rising trajectory of diabetes worldwide, the International Diabetes Federation estimated that there would be 642 million people with diabetes by 2040 [4].

The cardinal characteristic of type 2 diabetes is chronic hyperglycaemia subsequent from shortcomings in either secretion or action of insulin, or maybe both. Further, prediabetes characterized by impaired glucose tolerance (IGT) and/or impaired fasting glycaemia (IFG), is considered as a risk category that may progress to diabetes and cardiovascular disease (CVD) [5]. Diabetes may also lead to microvascular and macrovascular complications that can have effect on eyes, kidney, nerves, feet and heart. The main drivers of this rising type 2 diabetes are associated with rapid urbanization and inadequate or lack of physical activity due to transitions in lifestyles [4, 6]. Nevertheless, type 2 diabetes not only has an effect at individual level, but due to chronic nature of the condition has implications at health system and economic level as well [7].

Globally, cost of diabetes including its related complications was US\$ 548 billion in 2013 [8]. Estimates indicated that a person with diabetes utilized twice as much resources than with non-diabetes and experienced higher catastrophic health spending 17.8% (people with diabetes) vs. 13.9% (people with no-diabetes); (95% C.I. 0.2–7.7;  $p = 0.05$ ) [8]. Moreover, this increasing prevalence of diabetes with associated complications may contribute to increase in healthcare costs [6]. Undeniably, the direct costs (including diabetes treatment and complications) and indirect costs arising from productivity losses are huge [9]. Approximately one-fifth of worldwide health spending in case of diabetes is being spent in the economies of low- and middle-income countries [10]. Majority of these health systems are oriented towards provision of acute care and thus insufficiently organized for providing for long term conditions of chronic care of non-communicable disease (NCD) [7].

Thus rising burden of type 2 diabetes, its long asymptomatic period, long term and short-term complications of the disease are adding on to increasing resource strain on health systems [7, 11]. In such an instance, promoting health interventions such as lifestyle modifications are few of the many criteria that appropriate for public policy support for screening of diabetes including pre-diabetes [12]. Moreover, diabetes fulfils the seven screening criteria under the

widely used Wilson-Jugner criteria 1968 [13] for suitability to be part of screening programs. The benefits of screening for diabetes on mortality are not directly proven [14]. However, indirect benefits of screening may involve early detection of condition in apparently well individuals. This early detection of the condition may lead to lesser or delayed incidence of complications than those who were routinely diagnosed [15].

Across the globe, most of the screening programs for diabetes and prediabetes employed questionnaires/risk scoring tools and tests namely fasting blood/plasma glucose (FBG/FPG), HbA1c and random blood glucose (RBG) [5]. However, a systematic review by Engelgau summarized that risk scores do not perform well as stand-alone tests in screening programs and use of biochemical tests was encouraged [11]. The present guidelines adopted the cut off of HbA1c as 6.5% based on the findings of DETECT-2 study [16]. Further the International Expert Committee report also concluded that for identifying people at risk of developing complication like retinopathy, HbA1c 6.5% level provided sufficiently sensitive and specific evidence to capture the same [17]. There have been previous attempts to report on diagnostic accuracy of these blood tests [18, 19]. A systematic review by Bennet in 2007 narratively presented the findings for HbA1c for diabetes and did not undertake meta-analysis [18]. A meta-analysis by Kodama in 2013 included studies using abnormal A1c and FPG values for diagnosing and predicting diabetes [20]. Using data from previous two systematic reviews [18, 20], a meta-analytical comparison of HbA1c and FPG was done by Hoyer in 2018 [21]. Another published meta-analysis reported on the summary estimates for diagnostic accuracy for HbA1c for prediabetes [19]. However, little information is available about diagnostic accuracy of these most commonly used tests compared with a common reference standard for detection of type 2 diabetes and pre-diabetes in previously undiagnosed population. We aimed to bridge this gap in evidence by undertaking this systematic review. The main objective of this review was to assess the diagnostic accuracy (sensitivity and specificity) of screening tests for early detection of type 2 diabetes and prediabetes in individuals not previously diagnosed with diabetes. Our specific objectives focussed on summarising the evidence for various types of screening tests used to detect blood glucose levels; and determining the optimal cut-offs in terms of sensitivity and specificity for these tests from the evidence collated. Our findings may be useful to clinicians, health care managers and policy-makers involved in provision of health care for diabetes and prediabetes worldwide.

## Methods

The present systematic review is reported based on PRISMA-DTA checklist [22] and Meta-analysis and guided by “Cochrane Handbook for Systematic Reviews of Diagnostic Test Accuracy Reviews [23]. It was registered on the International prospective register of systematic reviews PROSPERO with CRD ID CRD42018102477.

## Eligible studies

We sought studies that reported the diagnostic accuracy of blood glucose tests for detecting type 2 diabetes (T2DM) and/or prediabetes in adults aged 18 years or more, recruited from community settings and without any previous history of type 2 diabetes. A study was considered also eligible if the study population below 18 years was ten per cent or less of that study population. Based on previous knowledge through a review of literature [5], the tests (venous or capillary sample) considered for screening for type 2 diabetes were random blood/plasma glucose, fasting blood/plasma glucose, HbA1c and post prandial glucose. 75-gram Oral Glucose Tolerance Test (or 2-hr post load glucose through venous route) was taken as the reference standard [24]. Studies where reference standard sample was taken through capillary route

were not included. No restrictions on study design, time period or language were considered while carrying out the searches. Studies with index test and reference standards performed on all participants were considered. The studies using World Health Organization (WHO) or American Diabetes Association (ADA) or both criteria for diagnosis of diabetes & prediabetes were considered. Any opinion-piece, editorial, studies conducted in children, adolescents or pregnant women with type 2 diabetes, type 1 diabetes or in animals were excluded. Any study in non-English language was only excluded at time of analysis if English translation from either author of included studies or web/internet sources was unavailable. Case control studies were excluded as these studies are prone to bias [25].

### Data sources and searches

Search strategies were developed (S1 Appendix in [S1 File](#)) and modified accordingly to examine electronic databases from their inception to July 7, 2018. We updated the searches till 9<sup>th</sup> March 2020. These databases were MEDLINE (OVID), Pubmed, EMBASE, Web of Science Core Collection (1952 till March 2020), CINAHL, Scopus and Cochrane (Cochrane Database of Systematic Reviews and Cochrane Central Register of Controlled Trials). The other sources like bibliographic searches of the relevant reviews identified during the screening and websites of World Health Organization and International Diabetes Federation were also searched for relevant records. Combinations of Medical Subject Heading terms (where applicable) and text words were employed to make search algorithm that was combined using Boolean operators. Specifically, terms (and their synonyms) to identify adults, index tests (Glycated Hemoglobin/HbA1c, fasting glucose, random glucose), reference standard (Oral Glucose Tolerance test), diabetes, prediabetes and outcomes like sensitivity and specificity were included in the search strategy (S1 Box in [S1 File](#)). The duplicates were removed automatically using Endnote Version X8 and manually during the screening.

### Study selection

Two reviewers (GK and HB) independently carried out the searches, manually screened and selected the records based on pre-decided inclusion and exclusion criteria. Further, the data was extracted using a standardized form. Further, disagreements at any stage of this systematic review were resolved by discussion with third reviewer (PVML) as arbitrator.

### Data extraction and quality assessment

Two reviewers independently extracted information using a data extraction form and further did quality assessment of included studies. Information on study setting, year of publication, sample size, prevalence of the target condition, methods of testing used, route of sample, reference standard were sought. Further, the data on diagnostic accuracy (sensitivity and specificity) were extracted by comparing the index tests against the reference standard for all the cut offs reported in the included studies. We included the information that was either provided in the study or we derived the number of true positives, false positives, false negatives and true negatives to generate two by two tables for respective cut-offs.

For the quality assessment, each included study was assessed using the Quality Assessment of Diagnostic Accuracy Studies (QUADAS-2) tool [26]. This tool has four domains comprising of patient selection, index test, reference standard and flow and timing under risk of bias assessment. The concerns regarding the applicability are ascertained for three domains of patient selection, index test and reference standard. The signaling questions to a domain were modified based on the review question and inclusion criteria. We did not consider the signaling question related to case control design being avoided in patient selection and whether all

patients received reference standard in flow and timing domain. This was done in accordance with exclusion criteria decided. In order to rate quality (low, unclear, high) to a particular domain, we referred to the guiding points reported elsewhere [27]. If a study scored unclear or high for one or more signaling questions in a domain, then the domain was scored unclear/high risk of bias.

## Data synthesis and analysis

We undertook descriptive analysis to report on the number of studies by methods, year and country of publication, condition being diagnosed, and guidelines used for diagnosis of diabetes/prediabetes. Moreover, the included studies were tabulated by the index tests and reference standards. We undertook quantitative synthesis for the included studies that used the same index test with similar route of sample collection. We then pooled results based on a single data point from each study, and also with regard to the most commonly reported threshold as per the WHO and ADA guidelines for diabetes/prediabetes. We used a bivariate model to pool our data [23]. We used `metandi` command in STATA (version 14, STATA CORP) to undertake meta-analysis; where a minimum of four or more studies was available for that particular test with same cut-off. We obtained summary estimates of sensitivity, specificity, positive and negative likelihood ratios (LR+ and LR-), with 95% confidence interval (CI). In order to calculate the optimal thresholds for the index test/s, we employed the novel approach and R code given by Steinhäuser 2016 [28] for a continuous bio-marker that used 2×2 tables from multiple thresholds per study included in the meta-analysis. This was done using R software (package `diagmeta`) [29]. Further, the GRADEPro tool [30] was used for assessing the certainty of evidence collated for reporting on the optimal thresholds for the index test at the outcome level [31]. The prevalence or the pre-test probability was calculated for each included study in the meta-analysis and the median prevalence estimate with interquartile range was used in the GRADEPro tool [32]. Assessment of four domains in the GRADE program was done based on the available guidance documents [32–34] and the explanation was provided in the footnotes (S4 Table in [S1 File](#)). A “high”, “moderate”, “low” or “very low” level for certainty of the evidence for the recommendation was decided as per the number of domains satisfied [35].

## Results

### Screening and selection of literature

[Fig 1](#) shows the detailed study selection process based on PRISMA-DTA reporting guidelines [36]. All the searches yielded a total of 8,713 records. After removal of duplicates ( $n = 1,562$ ) and subsequent to title and abstract screening, thirty-seven studies were considered for the final selection. In case of insufficient information or non-English articles, the corresponding authors were contacted through electronic mail; however only studies with adequate information were included in the review. Of the 37 studies, 21 studies assessed only HbA1c test (12 for diabetes alone; 8 for diabetes and prediabetes; 1 for prediabetes alone); nine studies assessed FPG primarily for diabetes; four studies assessed both HbA1c and FPG (3 for diabetes alone; 1 for diabetes and prediabetes), two studies assessed fasting capillary glucose and one study assessed random capillary blood glucose.

### Characteristics of the included studies

A total of 1,07,534 participants ( $n = 25$  studies) for diabetes; 39,846 for both diabetes and prediabetes ( $n = 11$  studies); and 667 for prediabetes alone ( $n = 1$  study) were included in this

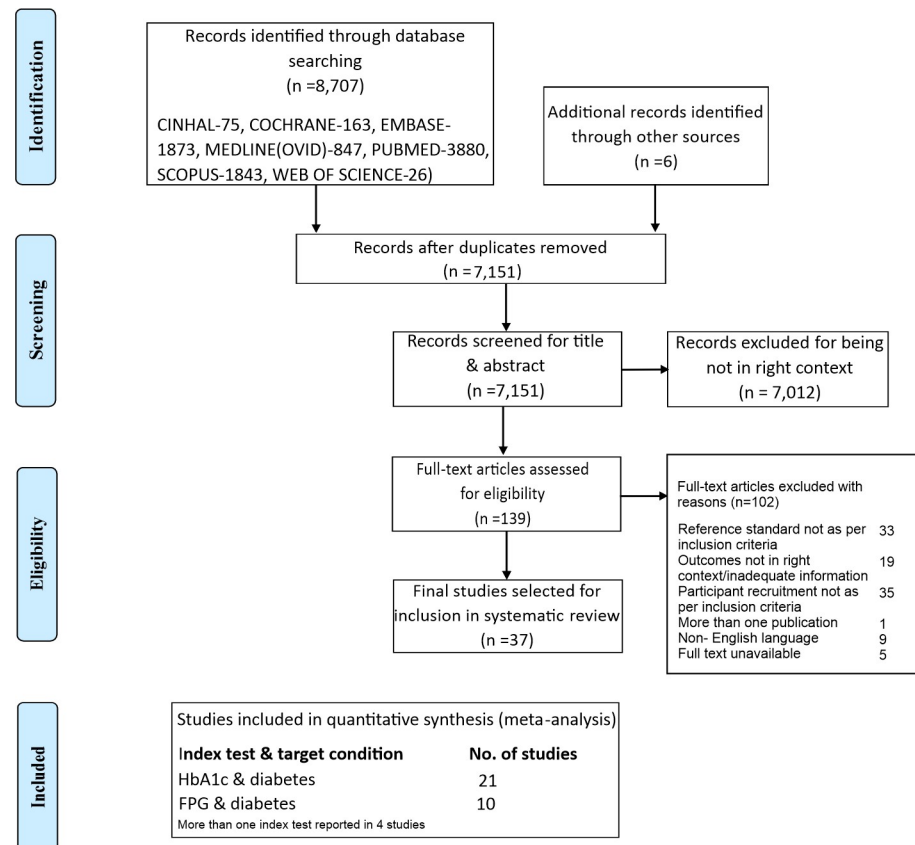

**Fig 1. PRISMA flow diagram.**

<https://doi.org/10.1371/journal.pone.0242415.g001>

systematic review. Most studies were conducted in China (30%), USA (11%) followed by South Africa (8%) (S2 Box in [S1 File](#)).

For diagnosing diabetes/prediabetes, 44% (n = 16) studies used WHO guidelines, 42% (n = 15) used ADA guidelines; and 14% (n = 5) used both. The key characteristics of the included studies can be seen in [Table 1](#).

## Quality assessment

Of the total twenty-three studies that employed HbA1c by blood sample/venous route, fourteen studies scored unclear risk of bias in the section on patient selection. Inadequate information on sampling methods (consecutive/random) employed was the prime cause (S2 and S3 Figs in [S1 File](#)). Further, one study scored unclear risk in same index test. Studies that mentioned description of diagnostic criteria to diagnose diabetes/prediabetes or on methods of sample collection for index test/reference standard were given low risk of bias. In addition, four studies were assigned unclear risk in flow and timing because inadequate information or longer duration between index and reference test could have introduced bias. One out of two studies using HbA1c by capillary route scored unclear risk of bias in patient selection, index test and reference standard (S3 and S4 Figs in [S1 File](#)). For studies that assessed FPG test (n = 13), six studies were assigned unclear risk in patient selection, index test and reference standard domains. Those studies (n = 2) where test accuracy results were not reported separately by 2-hrPG OGTT were given as unclear risk; this was due to uncertainty in

Table 1. Key characteristics of included studies.

| Author               | Country of study | Year of publication | Target Condition       | Sample analysed (N) | Diagnosis Criteria used | Blood glucose Test | Prevalence* (% of diabetes with reference standard) | No. (n) of diabetes diagnosed with reference standard | Prevalence of prediabetes based on reference standard | No. of prediabetes based on reference standard |
|----------------------|------------------|---------------------|------------------------|---------------------|-------------------------|--------------------|-----------------------------------------------------|-------------------------------------------------------|-------------------------------------------------------|------------------------------------------------|
| Little [51]          | USA              | 1988                | Diabetes               | 381                 | WHO                     | HbA1c              | 34                                                  | 112                                                   | -                                                     | -                                              |
| Hussein [52]         | Norway           | 2000                | Diabetes               | 445                 | WHO                     | FCBG               | 2.7                                                 | 12                                                    | -                                                     | -                                              |
| Rodriguez-Moran [53] | Mexico           | 2001                | Diabetes               | 712                 | ADA                     | FPG                | 9.12                                                | 65                                                    | -                                                     | -                                              |
| Daniel [54]          | Australia        | 2002                | Diabetes               | 3249                | ADA & WHO               | FPG                | 11.6                                                | 377                                                   | -                                                     | -                                              |
| Mannucci [45]        | Italy            | 2003                | Diabetes               | 1215                | WHO                     | FPG                |                                                     | 80                                                    | -                                                     | -                                              |
| Nakagami [55]        | Multi-country    | 2002                | Diabetes               | 17512               | -                       | FPG                | 6                                                   | 1051                                                  | -                                                     | -                                              |
| Al Lawati [56]       | Oman             | 2007                | Diabetes               | 4917                | ADA & WHO               | FPG                | 9.9                                                 | 489                                                   | -                                                     | -                                              |
| Somnnavar [57]       | India            | 2009                | Diabetes               | 1333                | WHO & ADA               | RCBG               | 13.9                                                | 185                                                   | -                                                     | -                                              |
| Zhou [40]            | China            | 2010                | Diabetes & prediabetes | 903                 | WHO                     | HbA1c              | 11.1                                                | 100                                                   | 22.4                                                  | 202                                            |
| Araneta [58]         | Japan            | 2010                | Diabetes               | 933                 | ADA                     | HbA1c              | 15.5                                                | 145                                                   | -                                                     | -                                              |
| Kramer [59]          | Brazil           | 2010                | Diabetes               | 2107                | ADA                     | HbA1c              |                                                     | 198                                                   | -                                                     | -                                              |
| Mohan V [22]         | India            | 2010                | Diabetes               | 2188                | WHO                     | HbA1c              | 10.1                                                | 220                                                   | -                                                     | -                                              |
| van't Riet [60]      | Netherlands      | 2010                | Diabetes               | 2753                | WHO                     | HbA1c              | 4                                                   | 107                                                   | -                                                     | -                                              |
| Choi [61]            | Korea            | 2011                | Diabetes               | 9375                | ADA                     | HbA1c              | 6.8                                                 | 635                                                   | -                                                     | -                                              |
| Bhowmik [41]         | Bangladesh       | 2013                | Diabetes & prediabetes | 2293                | WHO                     | HbA1c              | 7.9                                                 | 181                                                   | 8.6                                                   | 197                                            |
| Zhao [62]            | China            | 2013                | Diabetes & prediabetes | 993                 | WHO                     | FCG                | 5.7                                                 | 57                                                    | 14.6                                                  | 145                                            |
| Wu [63]              | China            | 2013                | Diabetes & prediabetes | 3354                | WHO                     | HbA1c              | 21.26                                               | 725                                                   | 40.16                                                 | 1347                                           |
| Ma Hui [64]          | China            | 2013                | Diabetes & prediabetes | 1973                | WHO                     | HbA1c              | 13.7                                                | 271                                                   | 24                                                    | 474                                            |
| Huang [43]           | China            | 2013                | Diabetes               | 6540                | ADA                     | HbA1c              | 6.04                                                | 422                                                   | -                                                     | -                                              |
| Vlaar [65]           | Netherlands      | 2013                | Diabetes & prediabetes | 944                 | ADA                     | HbA1c              | 3.7                                                 | 35                                                    | 20.2                                                  | 191                                            |
| Liang [66]           | China            | 2014                | Diabetes & prediabetes | 8239                | WHO                     | HbA1c              | 10.7                                                | 880                                                   | 19                                                    | 1565                                           |
| Huang [67]           | USA              | 2015                | Diabetes               | 5782                | ADA                     | FPG                | -                                                   | 231                                                   | -                                                     | -                                              |
| Aekaplakorn [68]     | Thailand         | 2015                | Diabetes & prediabetes | 6884                | ADA                     | FPG                | -                                                   | 759                                                   | -                                                     |                                                |
| Zemlin [69]          | South Africa     | 2015                | Prediabetes            | 667                 | ADA                     | HbA1c              | -                                                   | -                                                     | 27.7                                                  | 185                                            |
| Bao [70]             | China            | 2015                | Diabetes & prediabetes | 7464                | WHO & ADA               | FPG                | -                                                   | 282                                                   | 9                                                     | -                                              |
| Inceni [71]          | Italy            | 2015                | Diabetes & prediabetes | 462                 | ADA                     | HbA1c              | 11                                                  | 51                                                    | 65                                                    | 300                                            |
| Aviles Santa [72]    | USA              | 2016                | Diabetes               | 15507               | ADA                     | HbA1c              | 4.4                                                 | 764                                                   | -                                                     | -                                              |
| Hird [42]            | South Africa     | 2016                | Diabetes               | 1077                | WHO                     | HbA1c              | 3.5                                                 | 38                                                    | -                                                     | -                                              |
| Karnchanasorn [73]   | USA              | 2016                | Diabetes               | 5764                | ADA                     | HbA1c              | 6.8                                                 | 392                                                   | -                                                     | -                                              |
| Liu [74]             | China            | 2016                | Diabetes & prediabetes | 7611                | WHO                     | HbA1c              | -                                                   | 411                                                   | -                                                     | 473                                            |
| Zou [75]             | China            | 2016                | Diabetes               | 3050                | WHO                     | HbA1c              | 10.2                                                | 311                                                   | -                                                     | -                                              |

(Continued)

Table 1. (Continued)

| Author              | Country of study | Year of publication | Target Condition       | Sample analysed (N) | Diagnosis Criteria used | Blood glucose Test | Prevalence* (% of diabetes with reference standard) | No. (n) of diabetes diagnosed with reference standard | Prevalence of prediabetes based on reference standard | No. of prediabetes based on reference standard |
|---------------------|------------------|---------------------|------------------------|---------------------|-------------------------|--------------------|-----------------------------------------------------|-------------------------------------------------------|-------------------------------------------------------|------------------------------------------------|
| Herath [76]         | Sri Lanka        | 2017                | Diabetes               | 254                 | ADA & WHO               | HbA1c              | 16.1                                                | 41                                                    | -                                                     | -                                              |
| Wu [77]             | China            | 2017                | Diabetes               | 4325                | WHO                     | HbA1c              | 13.8                                                | -                                                     | -                                                     |                                                |
| Zhou [78]           | China            | 2018                | Diabetes & prediabetes | 7909                | WHO                     | HbA1c              | 8.79                                                | 695                                                   | 19.1                                                  | 1514                                           |
| Lim [79]            | Singapore        | 2018                | Diabetes               | 3540                | ADA                     | HbA1c & FPG        | -                                                   | 332                                                   | -                                                     | -                                              |
| Prakashchandra [80] | South Africa     | 2018                | Diabetes               | 1378                | ADA                     | HbA1c & FPG        | -                                                   | 154                                                   | -                                                     | -                                              |
| Katulanda [81]      | Sri Lanka        | 2019                | Diabetes               | 4014                | ADA                     | FPG                | 4.7                                                 | 191                                                   | -                                                     | -                                              |

\* Prevalence or number of participants with diabetes based on OGTT/2hrPG values.

<https://doi.org/10.1371/journal.pone.0242415.t001>

interpretation of results of FPG without knowledge of result of OGTT as FPG is also part of the latter (S5 and S6 Figs in [S1 File](#)). For applicability concerns, most of the studies for all tests were treated as low concern.

### Pooled diagnostic accuracy of blood glucose tests (meta-analysis)

A total of twenty-one studies were included in meta-analysis for HbA1c and ten studies for FPG for diabetes for various thresholds with the number of studies included and cases, their combined sensitivities and specificities shown in [Table 2](#). The number of true positives and

Table 2. Pooled estimates (meta-analysis) at various cut-offs for diagnostic accuracy of HbA1c (%) and FPG (mg/dL) for diabetes.

|                    | Threshold value used for diabetes | Number of studies | Number of cases (true positives & false negatives) & participants | Sensitivity (95% CI) | Specificity (95% CI) | Positive Likelihood ratio (95% CI) | Negative Likelihood ratio (95% CI) |
|--------------------|-----------------------------------|-------------------|-------------------------------------------------------------------|----------------------|----------------------|------------------------------------|------------------------------------|
| <b>HbA1c (%)</b>   | 5.7                               | 7                 | 2506/29076                                                        | 0.888 (0.830–0.927)  | 0.657 (0.531–0.765)  | 2.588 (1.878–3.566)                | 0.171 (0.119–0.246)                |
|                    | 5.8                               | 8                 | 3127/36863                                                        | 0.818 (0.749–0.871)  | 0.781 (0.680–0.857)  | 3.738 (2.587–5.401)                | 0.233 (0.175–0.310)                |
|                    | 5.9                               | 7                 | 2958/34866                                                        | 0.770 (0.6874–0.837) | 0.834 (0.742–0.898)  | 4.644 (3.080–7.0022)               | 0.276 (0.209–0.363)                |
|                    | 6.0                               | 10                | 3381/39115                                                        | 0.757 (0.681–0.819)  | 0.893 (0.843–0.929)  | 7.084 (4.896–10.254)               | 0.272 (0.208–0.356)                |
|                    | 6.1                               | 7                 | 2543/27679                                                        | 0.726 (0.596–0.826)  | 0.932 (0.873–0.964)  | 10.605 (6.166–18.240)              | 0.294 (0.199–0.436)                |
|                    | 6.2                               | 4                 | 2118/23217                                                        | 0.655 (0.538–0.7554) | 0.935 (0.872–0.968)  | 10.042 (5.672–17.781)              | 0.370 (0.279–0.490)                |
|                    | 6.3                               | 6                 | 1710/17151                                                        | 0.654 (0.574–0.727)  | 0.945 (0.902–0.970)  | 11.960 (6.940–20.610)              | 0.366 (0.297–0.450)                |
|                    | 6.4                               | 5                 | 2059/21670                                                        | 0.624 (0.527–0.712)  | 0.950 (0.904–0.975)  | 12.589 (7.079–22.387)              | 0.396 (0.317–0.494)                |
|                    | 6.5                               | 17                | 5132/64928                                                        | 0.502 (0.417–0.588)  | 0.973 (0.953–0.984)  | 18.328 (11.067–30.353)             | 0.512(0.432–0.605)                 |
| <b>FPG (mg/dL)</b> | 126                               | 10                | 3438/45917                                                        | 0.594 (0.466–0.710)  | 0.988 (0.965–0.996)  | 47.825 (19.104–119.729)            | 0.411 (0.305–0.555)                |

\* Estimates are rounded off to nearest number or three decimal places.

<https://doi.org/10.1371/journal.pone.0242415.t002>



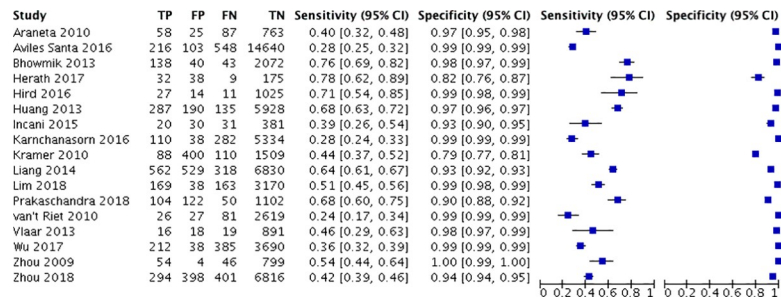

**Fig 2. Forest plot of HbA1c 6.5% for detecting diabetes.**

<https://doi.org/10.1371/journal.pone.0242415.g002>

negatives and false positives and negatives at the recommended thresholds of HbA1c 6.5% and FPG 126mg/dl are depicted in forest plots in Figs 2 and 3 respectively. The summary sensitivity, specificity, LR+ and LR- for HbA1c at a common cut off of 6.5% (venous sample) for diagnosing diabetes were 50% (95% CI: 42–59%), 97% (95% CI: 95–98%), 18.3 (95% CI: 11–30) and 0.51 (95% CI: 0.432–0.605), respectively. Details of stratified analysis with studies using HbA1c against OGTT and with WHO criteria are provided in S2 Table in S1 File. Similarly, for the FPG test (cut off as 126 mg/dL) the corresponding values are 59.4% (95% CI: 46.6–71%), 98.8% (95% CI: 96.5–99.6%), 47.825 (95% CI: 19.10–119.73) and 0.411 (95% CI: 0.305–0.555). Figs 4 and 5 show the SROC plots for these two tests HbA1c (6.5%) and Fasting Plasma Glucose (126 mg/dL) for diabetes respectively.

The optimal cut off value for sensitivity and specificity for HbA1c for diagnosing diabetes in previously undiagnosed population was estimated as 6.03%. The pooled sensitivity and specificity at this optimal threshold for HbA1c 6.03% for diabetes were 74% (95% CI: 68–79%) and 87.2% (95% CI: 82–91%). Fig 6 shows this optimal cut-off for HbA1c on summary receiver operating characteristic curve; where each study is denoted by a coloured circle and numbers along the curve represent various thresholds for HbA1c. Estimated optimal cut-off for FPG for diagnosing diabetes was 104 mg/dL with pooled sensitivity of 82.3% (95% CI: 74.6–88.1%) and specificity of 89.4% (95% CI:85.2–92.5%) (Fig 7).

Using the GRADE approach, we found that the certainty of evidence collated at the outcome level (sensitivity and specificity) for optimal cut off of HbA1c 6.03% was of moderate quality (S5 Table in S1 File). The estimated median prevalence (with interquartile range) of diabetes from the included studies in the meta-analysis for HbA1c (n = 21) was 9.38% (IQR: 6.77–11.07).

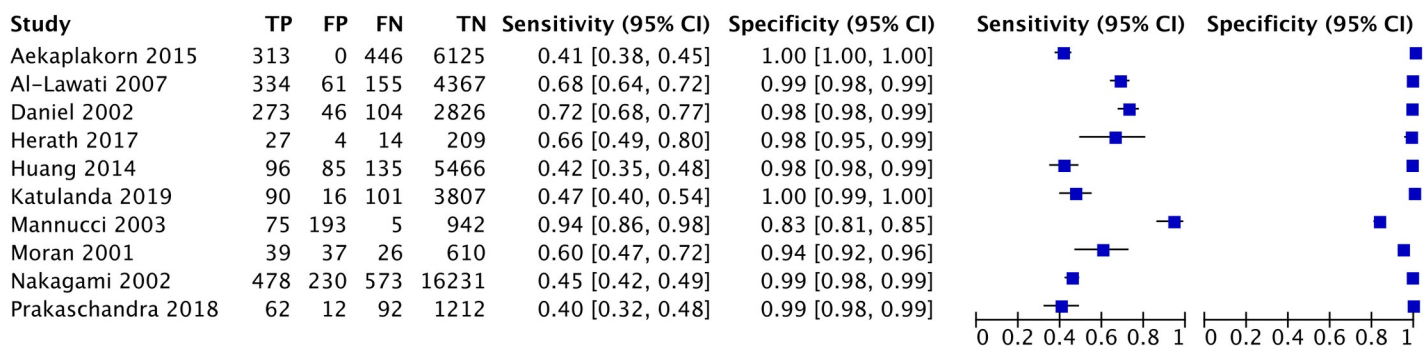

**Fig 3. Forest plot of FPG 126 mg/dL for detecting diabetes.**

<https://doi.org/10.1371/journal.pone.0242415.g003>

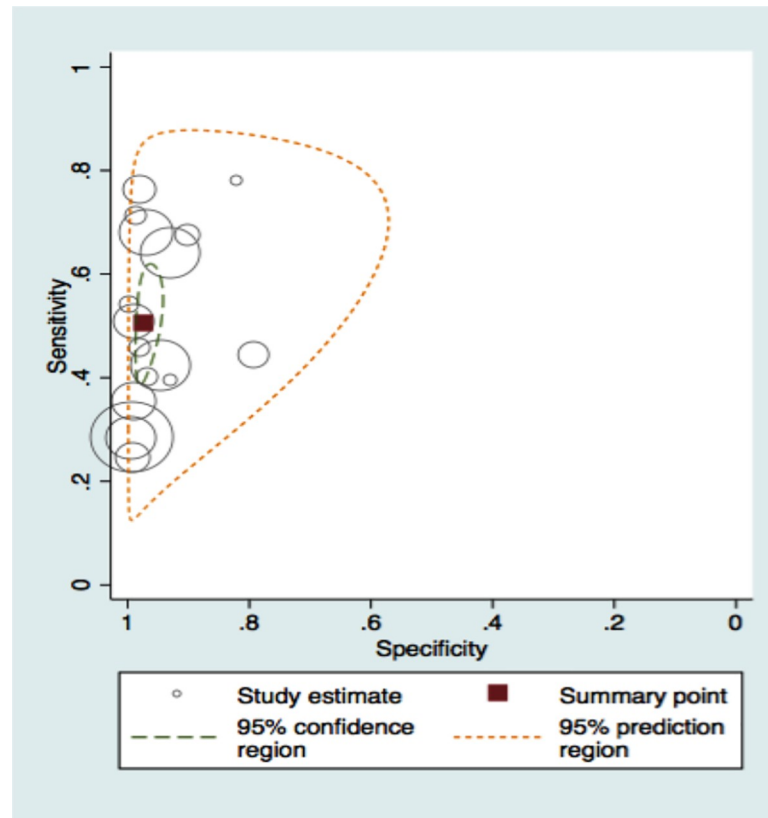

**Fig 4. Summary receiver operating characteristic plot of HbA1c (6.5%) for detecting diabetes.**

<https://doi.org/10.1371/journal.pone.0242415.g004>

## Discussion

This meta-analysis summarizes the evidence on paired outcomes (sensitivity and specificity) of diagnostic accuracy for the tests (HbA1c, FPG) used in the screening of diabetes and prediabetes in previously undiagnosed population. We found higher values of summary estimates specificity than sensitivity for both HbA1c and FPG at the common thresholds recommended by WHO and ADA guidelines for diagnosis of diabetes. The most relevant finding of our meta-analysis was determination of optimal thresholds of 6.03% for HbA1c and 104 mg/dL for FPG in previously undiagnosed population for detecting diabetes. However, there were insufficient number of studies that estimated diagnostic accuracy over the range of cut-offs to diagnose prediabetes as per present WHO/ADA guidelines (S6 Table in [S1 File](#)). So, we could not perform meta-analysis for the same.

This meta-analysis provides a comprehensive overview regarding diagnostic accuracy of these tests for an early diagnosis for diabetes in previously undiagnosed population. Based on the evidence collated from the test accuracy studies, the sensitivity and specificity ranged from 24% to 78% and 79% to 100% respectively for HbA1c (6.5%) for diagnosis of diabetes. Variation in sensitivity from 40% to 94% and specificity from 83% to 100% for FPG 126 mg/dl was noted. These are the two most frequently used blood glucose tests recommended for screening for type 2 diabetes across high income country settings [19].

Our findings in terms of estimates of pooled sensitivity for HbA1c 6.5% (pooled sensitivity—0.502) are slightly lower to those reported elsewhere in meta-analysis by Xu 2014 (pooled sensitivity—0.518) for Chinese adults [37]. However, our summary estimates of sensitivity are

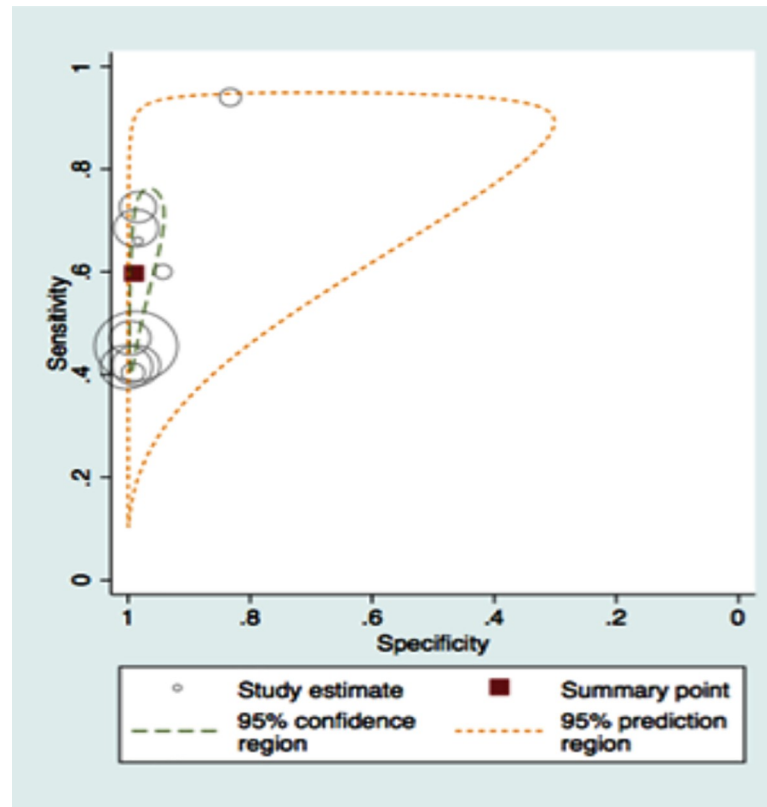

Fig 5. Summary receiver operating characteristic plot of FPG (126 mg/dL) for detecting diabetes.

<https://doi.org/10.1371/journal.pone.0242415.g005>

higher than those reported in another study (pooled sensitivity-0.371) that evaluated diagnostic test accuracy of HbA1c against 2hrOGTT [38]. On the contrary, our finding of pooled specificity for HbA1c 6.5% is higher than reported by Xu 2014 and lower than in [38]. Two other published systematic reviews did not undertake meta-analysis and narratively reported on diagnostic accuracy of HbA1c for diabetes screening [18, 39]. Moreover, the latter systematic review took into account both people with and without diabetes and reviewed performance of HbA1c for prediction of microvascular complications like retinopathy [39]. Our results found a lower sensitivity but slightly higher specificity for FPG (126mg/dl or 7mmol/l) detecting diabetes in undiagnosed persons than estimated by another meta-analysis [38]. Our finding of optimal cut-off of HbA1c as 6.03% for diagnosis in previously undiagnosed population lies within the range suggested by a previous work [18, 21]; and close to optimal cut-off (6.0%) estimated by a number of included cross-sectional studies [40–44]. We found the certainty of evidence for the optimal threshold for sensitivity and specificity for HbA1c (6.03%) as of moderate quality (S6 Table in S1 File). We downgraded by one level for risk of bias in patient selection. Methods of recruitment like through invitation or volunteering may lead to bias through self-referral unlike when random/consecutive sampling techniques are used. Similar observation has been reported previously [19, 45]. However, our finding of optimal threshold for FPG differs from that estimated by Hoyer 2018 [21].

Considering the rising prevalence of diabetes worldwide, our findings have important implications from both clinical and policy perspective. There is an ever-growing debate on the present cut-offs proposed for diagnosing diabetes and prediabetes [46]. HbA1c level values are indicator of long term glucose control and also provide a link to development of microvascular

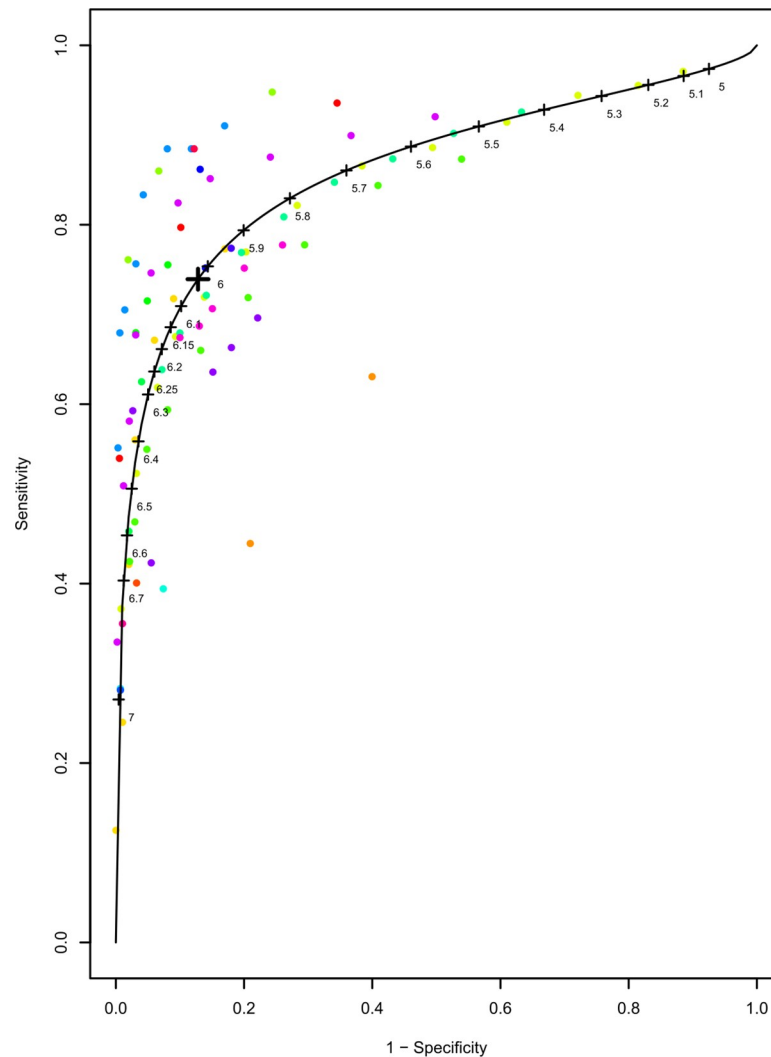

**Fig 6. Summary receiver operating characteristic curve showing the optimal cut off of HbA1c 6.03% for detecting diabetes.**

<https://doi.org/10.1371/journal.pone.0242415.g006>

complications [46]. However, it is also true that the growing epidemic of diabetes warrants for tests with higher sensitivity for early identification of the disease. Thus, based on our review findings and previous work [21] lowering the thresholds for higher sensitivity for screening purpose may be considered. An early institution of preventive interventions for people at high risk and treatment control for newly diagnosed can help in reducing the incidence of complications in people with diabetes. It is noteworthy to mention here that the risk of complications like mortality risk from cardiovascular disease starts in the prediabetes stage even before clinical diabetes sets in and may also lead to significant morbidities as well [5, 47]. Similarly, people with diabetes are at about twice the risk of premature mortality than those without it [48]. Diabetes is also risk factor for other conditions like end-stage renal disease, retinopathy, peripheral vascular disease, cerebrovascular disease and other disabling conditions like depression. Development of complications magnify the cost of care for both the health provider and the individual.

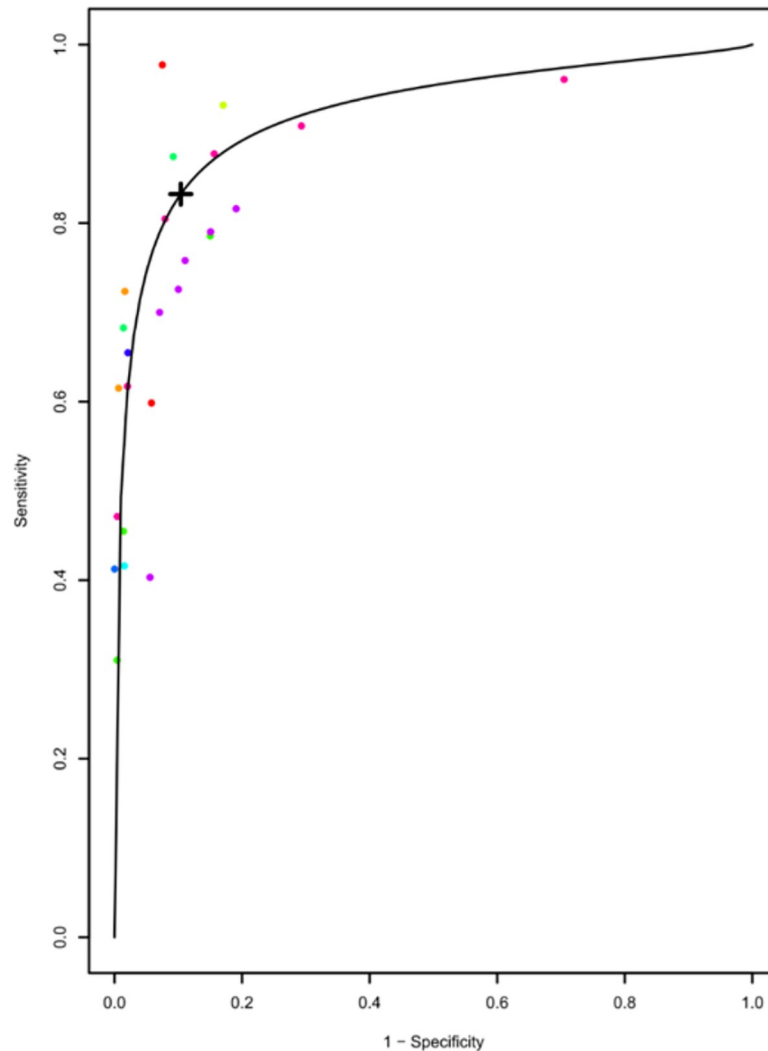

**Fig 7. Summary receiver operating characteristic curve showing the optimal cut off of FPG 104 mg/dL for detecting diabetes.**

<https://doi.org/10.1371/journal.pone.0242415.g007>

There are several strengths of the present systematic review and meta-analysis. Firstly, a thorough search was done in all relevant electronic databases, irrespective of any filters based on time, design, country or language of records on diagnostic accuracy of the index tests specified. Secondly, the studies included are representative individuals ( $\geq 18$  years) without any previously diagnosed diabetes, primarily recruited from community settings across the globe and of mixed ethnicities. Thirdly, only those studies were chosen wherein the index and reference standards were done on all the sampled population. Fourthly, we analysed and demonstrated the pooled estimates of diagnostic accuracy of the index tests with the use of bivariate random effects model, addressing inherent heterogeneity in these diagnostic accuracy studies. These random effects models are the most commonly recommended methods of synthesis for diagnostic accuracy meta-analysis [49]. These models have an advantage that, unlike previous methods, they account for both within-study and between-study variability [49]. Finally, our estimates of optimal cut-offs are based on a newer approach by Steinhauser 2016 reported elsewhere that makes use of all the available information reported on thresholds in case of

continuous biomarkers and avoids any overestimation of results [28]. In general, while undertaking a meta-analysis for diagnostic accuracy, each study contributes only one pair of sensitivity and specificity. However, if studies present more than one threshold, as in our case, reducing the data and selecting a specific threshold per study to find out optimal cut-off may lead to inadequate use of information and thus introduce a bias. We incorporated all the information from the studies included in the meta-analysis to estimate optimal cut-off for the index tests.

Our present work had several limitations. Firstly, we ourselves did not undertake any further translations of the studies that were in non-English language. Secondly, no indirect comparisons between the different index tests to establish the best test for diagnosing diabetes and prediabetes were done. Thirdly, due to insufficient number of studies, the pooled estimates for prediabetes and other tests like random, fasting and HbA1c by capillary method could not be estimated in this review. Fourthly, we did not attempt to rate certainty of evidence for optimal cut-off FPG. This becomes challenging to implement and interpret especially when few studies report on multiple tests. Further guidance may be helpful to users on how to rate evidence when newer methods of pooling using multiple information are used. Lastly, we did not undertake sub-group analysis based on the ethnicity, classification of country region by income or methods. A systematic review [50] investigated the effect of ethnicity on HbA1c values in people without diabetes. However, exploring the role of ethnicity in estimation of optimal thresholds for these index tests and which is the best test to diagnose can be considered as future area of research. Further, the optimal cut-offs estimated for HbA1c and FPG are chiefly from statistical perspective. Role of clinical parameters and economic decision modelling for various screening strategies with these tests can be another future area of research.

In summary, our findings on the pooled estimates of diagnostic accuracy like sensitivity and specificity can be useful to researchers and policy makers for undertaking health technology assessments (HTA) for various screening strategies for diabetes. Lowering of thresholds of HbA1c to 6.03% or FPG to 104 mg/dl may be considered for screening for diabetes in previously undiagnosed individuals.

## Supporting information

**S1 Checklist. PRISMA DTA checklist.**  
(DOCX)

**S1 File.**  
(DOCX)

## Acknowledgments

We are grateful to Mrs. Pranita Pradhan (information specialist) at the ICMR Advanced Centre for Evidence based Child Health at Post Graduate Institute of Medical Education and Research (PGIMER) Chandigarh for her assistance for searches.

## Author Contributions

**Conceptualization:** Gunjeet Kaur, P. V. M. Lakshmi, Shankar Prinja.

**Formal analysis:** Gunjeet Kaur, P. V. M. Lakshmi, Ashu Rastogi, Henna Bano, Shankar Prinja.

**Methodology:** Gunjeet Kaur, P. V. M. Lakshmi, Ashu Rastogi, Anil Bhansali, Sanjay Jain, Yot Teerawattananon, Henna Bano, Shankar Prinja.

**Software:** Gunjeet Kaur, P. V. M. Lakshmi.

**Supervision:** P. V. M. Lakshmi, Yot Teerawattananon, Shankar Prinja.

**Writing – original draft:** Gunjeet Kaur.

**Writing – review & editing:** P. V. M. Lakshmi, Ashu Rastogi, Anil Bhansali, Sanjay Jain, Yot Teerawattananon, Henna Bano, Shankar Prinja.

## References

1. UN. Future We Want 2012 [Available from: [http://www.un.org/en/development/desa/population/migration/generalassembly/docs/globalcompact/A\\_RES\\_66\\_288.pdf](http://www.un.org/en/development/desa/population/migration/generalassembly/docs/globalcompact/A_RES_66_288.pdf)].
2. WHO. Global action plan for the prevention and control of noncommunicable diseases 2013–2020. World Health Organization; 2013. Report No.: 9241506237.
3. WHO. Definition of regional groupings. [Available from: [http://www.who.int/healthinfo/global\\_burden\\_disease/definition\\_regions/en/](http://www.who.int/healthinfo/global_burden_disease/definition_regions/en/)].
4. Chatterjee S, Khunti K, Davies MJ. Type 2 diabetes. *Lancet* (London, England). 2017; 389 (10085):2239–51.
5. Echouffo-Tcheugui JB, Ali MK, Griffin SJ, Narayan KM. Screening for type 2 diabetes and dysglycemia. *Epidemiologic reviews*. 2011; 33:63–87. <https://doi.org/10.1093/epirev/mxq020> PMID: 21624961
6. Pradeepa R, Mohan V. Prevalence of type 2 diabetes and its complications in India and economic costs to the nation. *European Journal of Clinical Nutrition*. 2017. <https://doi.org/10.1038/ejcn.2017.40> PMID: 28422124
7. Beran D. The impact of health systems on diabetes care in low and lower middle income countries. *Current diabetes reports*. 2015; 15(4):20. <https://doi.org/10.1007/s11892-015-0591-8> PMID: 25721248
8. Smith-Spangler CM, Bhattacharya J, Goldhaber-Fiebert JD. Diabetes, its treatment, and catastrophic medical spending in 35 developing countries. *Diabetes care*. 2012; 35(2):319–26. <https://doi.org/10.2337/dc11-1770> PMID: 22238276
9. Rice DP, Hodgson TA. The value of human life revisited. *American journal of public health*. 1982; 72 (6):536–8. <https://doi.org/10.2105/ajph.72.6.536> PMID: 6803601
10. IDF. Diabetes Atlas. Brussels, Belgium: International Diabetes Federation; 2015.
11. Engelgau MM, Narayan K, Herman WH. Screening for type 2 diabetes. *Diabetes care*. 2000; 23 (10):1563–80. <https://doi.org/10.2337/diacare.23.10.1563> PMID: 11023153
12. Barengo NC, Tuomilehto JO. How can we identify candidates at highest risk—to screen or not to screen? *Herz*. 2016; 41(3):175–83. <https://doi.org/10.1007/s00059-016-4417-5> PMID: 27052353
13. Wilson JMG, Jungner G, Organization WH. Principles and practice of screening for disease. 1968. PMID: 4234760
14. Duraõ S, Ajumobi O, Kredõ T, Naude C, Levitt NS, Steyn K, et al. Evidence insufficient to confirm the value of population screening for diabetes and hypertension in low- and-middle-income settings. *South African medical journal = Suid-Afrikaanse tydskrif vir geneeskunde*. 2015; 105(2):98–102. <https://doi.org/10.7196/samj.8819> PMID: 26242524
15. Khunti K, Davies M. Should we screen for type 2 diabetes: Yes. *BMJ* (Clinical research ed). 2012; 345: e4514. <https://doi.org/10.1136/bmj.e4514> PMID: 22777029
16. Colagiuri S, Lee CM, Wong TY, Balkau B, Shaw JE, Borch-Johnsen K. Glycemic thresholds for diabetes-specific retinopathy: implications for diagnostic criteria for diabetes. *Diabetes care*. 2011; 34 (1):145–50. <https://doi.org/10.2337/dc10-1206> PMID: 20978099
17. International Expert Committee report on the role of the A1C assay in the diagnosis of diabetes. *Diabetes care*. 2009; 32(7):1327–34. <https://doi.org/10.2337/dc09-9033> PMID: 19502545
18. Bennett CM, Guo M, Dharmage SC. HbA(1c) as a screening tool for detection of Type 2 diabetes: a systematic review. *Diabetic medicine: a journal of the British Diabetic Association*. 2007; 24(4):333–43. <https://doi.org/10.1111/j.1464-5491.2007.02106.x> PMID: 17367307
19. Barry E, Roberts S, Oke J, Vijayaraghavan S, Normansell R, Greenhalgh T. Efficacy and effectiveness of screen and treat policies in prevention of type 2 diabetes: systematic review and meta-analysis of screening tests and interventions. *BMJ* (Clinical research ed). 2017; 356:i6538. <https://doi.org/10.1136/bmj.i6538> PMID: 28052845
20. Kodama S, Horikawa C, Fujihara K, Hirasawa R, Yachi Y, Yoshizawa S, et al. Use of high-normal levels of haemoglobin A(1C) and fasting plasma glucose for diabetes screening and for prediction: a meta-

- analysis. *Diabetes/metabolism research and reviews*. 2013; 29(8):680–92. <https://doi.org/10.1002/dmrr.2445> PMID: 23963843
21. Hoyer A, Rathmann W, Kuss O. Utility of HbA(1c) and fasting plasma glucose for screening of Type 2 diabetes: a meta-analysis of full ROC curves. *Diabetic medicine: a journal of the British Diabetic Association*. 2018; 35(3):317–22.
  22. Mohan V, Vijayachandrika V, Gokulakrishnan K, Anjana RM, Ganesan A, Weber MB, et al. A1C cut points to define various glucose intolerance groups in Asian Indians. *Diabetes care*. 2010; 33(3):515–9. <https://doi.org/10.2337/dc09-1694> PMID: 19903752
  23. Leeflang MM, Deeks JJ, Takwoingi Y, Macaskill P. Cochrane diagnostic test accuracy reviews. *Systematic reviews*. 2013; 2:82. <https://doi.org/10.1186/2046-4053-2-82> PMID: 24099098
  24. Organization WH. Definition, diagnosis and classification of diabetes mellitus and its complications: report of a WHO consultation. Part 1, Diagnosis and classification of diabetes mellitus. Geneva: World health organization; 1999.
  25. Bossuyt P, Leeflang M. Chapter 6: developing criteria for including studies. *Cochrane handbook for systematic reviews of diagnostic test accuracy version 04 [updated September 2008]* The Cochrane Collaboration. 2008.
  26. Whiting PF, Rutjes AW, Westwood ME, Mallett S, Deeks JJ, Reitsma JB, et al. QUADAS-2: a revised tool for the quality assessment of diagnostic accuracy studies. *Ann Intern Med*. 2011; 155(8):529–36. <https://doi.org/10.7326/0003-4819-155-8-201110180-00009> PMID: 22007046
  27. Leeflang MM, Ang CW, Berkhout J, Bijlmer HA, Van Bortel W, Brandenburg AH, et al. The diagnostic accuracy of serological tests for Lyme borreliosis in Europe: a systematic review and meta-analysis. *BMC infectious diseases*. 2016; 16:140. <https://doi.org/10.1186/s12879-016-1468-4> PMID: 27013465
  28. Steinhauser S, Schumacher M, Rucker G. Modelling multiple thresholds in meta-analysis of diagnostic test accuracy studies. *BMC medical research methodology*. 2016; 16(1):97. <https://doi.org/10.1186/s12874-016-0196-1> PMID: 27520527
  29. R package Diagma [Available from: <https://cran.r-project.org/web/packages/diagma/index.html>
  30. McMaster University. GRADEpro GDT: GRADEpro Guideline Development Tool [Software]., 2015. (developed by Evidence Prime, Inc.); 2015. Contract No.: 19 May 2020.
  31. Schünemann HJ, Mustafa R, Brozek J, Santesso N, Alonso-Coello P, Guyatt G, et al. GRADE Guidelines: 16. GRADE evidence to decision frameworks for tests in clinical practice and public health. *Journal of clinical epidemiology*. 2016; 76:89–98. <https://doi.org/10.1016/j.jclinepi.2016.01.032> PMID: 26931285
  32. Mustafa RA, Wiercioch W, Santesso N, Cheung A, Prediger B, Baldeh T, et al. Decision-Making about Healthcare Related Tests and Diagnostic Strategies: User Testing of GRADE Evidence Tables. *PloS one*. 2015; 10(10):e0134553. <https://doi.org/10.1371/journal.pone.0134553> PMID: 26474310
  33. Schünemann HJ, Mustafa RA, Brozek J, Steingart KR, Leeflang M, Murad MH, et al. GRADE guidelines: 21 part 2. Test accuracy: inconsistency, imprecision, publication bias, and other domains for rating the certainty of evidence and presenting it in evidence profiles and summary of findings tables. *Journal of clinical epidemiology*. 2020.
  34. Callesch R, Sattelmayer M, Reichenbach S, Zwahlen M, Hilfiker R. Diagnostic accuracy of clinical tests for cam or pincer morphology in individuals with suspected FAI syndrome: a systematic review. *BMJ open sport & exercise medicine*. 2020; 6(1):e000772. <https://doi.org/10.1136/bmjsem-2020-000772> PMID: 32411383
  35. Guyatt G, Oxman AD, Akl EA, Kunz R, Vist G, Brozek J, et al. GRADE guidelines: 1. Introduction—GRADE evidence profiles and summary of findings tables. *Journal of clinical epidemiology*. 2011; 64(4):383–94. <https://doi.org/10.1016/j.jclinepi.2010.04.026> PMID: 21195583
  36. Moher D, Liberati A, Tetzlaff J, Altman DG. Preferred reporting items for systematic reviews and meta-analyses: the PRISMA statement. *International journal of surgery (London, England)*. 2010; 8(5):336–41. <https://doi.org/10.1016/j.ijsu.2010.02.007> PMID: 20171303
  37. Xu N, Wu H, Li D, Wang J. Diagnostic accuracy of glycosylated hemoglobin compared with oral glucose tolerance test for diagnosing diabetes mellitus in Chinese adults: a meta-analysis. *Diabetes Res Clin Pract*. 2014; 106(1):11–8. <https://doi.org/10.1016/j.diabres.2014.04.010> PMID: 24857263
  38. Effects of diabetes definition on global surveillance of diabetes prevalence and diagnosis: a pooled analysis of 96 population-based studies with 331,288 participants. *The Lancet Diabetes & endocrinology*. 2015; 3(8):624–37. [https://doi.org/10.1016/S2213-8587\(15\)00129-1](https://doi.org/10.1016/S2213-8587(15)00129-1) PMID: 26109024
  39. Organization WH. HbA1c in the diagnosis of type 2 diabetes: a systematic review. Geneva, Switzerland: World Health Organization. 2011.
  40. Zhou X, Pang Z, Gao W, Wang S, Zhang L, Ning F, et al. Performance of an A1C and fasting capillary blood glucose test for screening newly diagnosed diabetes and pre-diabetes defined by an oral glucose



- tolerance test in Qingdao, China. *Diabetes care*. 2010; 33(3):545–50. <https://doi.org/10.2337/dc09-1410> PMID: 20007941
41. Bhowmik B, Diep LM, Munir SB, Rahman M, Wright E, Mahmood S, et al. HbA(1c) as a diagnostic tool for diabetes and pre-diabetes: the Bangladesh experience. *Diabetic medicine: a journal of the British Diabetic Association*. 2013; 30(3):e70–7. <https://doi.org/10.1111/dme.12088> PMID: 23199158
  42. Hird TR, Pirie FJ, Esterhuizen TM, O'Leary B, McCarthy MI, Young EH, et al. Burden of Diabetes and First Evidence for the Utility of HbA1c for Diagnosis and Detection of Diabetes in Urban Black South Africans: The Durban Diabetes Study. *PloS one*. 2016; 11(8):e0161966. <https://doi.org/10.1371/journal.pone.0161966> PMID: 27560687
  43. Huang H, Peng G, Lin M, Zhang K, Wang Y, Yang Y, et al. The diagnostic threshold of HbA1c and impact of its use on diabetes prevalence—a population-based survey of 6898 Han participants from southern China. *Preventive medicine*. 2013; 57(4):345–50. <https://doi.org/10.1016/j.ypmed.2013.06.012> PMID: 23777673
  44. Zhou X, Ruan X, Hao L, Zhou Y, Gu J, Qiu H, et al. Optimal hemoglobin A1C cutoff value for diabetes mellitus and pre-diabetes in Pudong New Area, Shanghai, China. *Primary care diabetes*. 2018; 12(3):238–44. <https://doi.org/10.1016/j.pcd.2017.12.006> PMID: 29370998
  45. Mannucci E, Ognibene A, Sposato I, Brogi M, Gallori G, Bardini G, et al. Fasting plasma glucose and glycated haemoglobin in the screening of diabetes and impaired glucose tolerance. *Acta diabetologica*. 2003; 40(4):181–6. <https://doi.org/10.1007/s00592-003-0109-8> PMID: 14740278
  46. Saudek CD, Kalyani RR, Derr RL. Assessment of glycemia in diabetes mellitus: hemoglobin A1c. *The Journal of the Association of Physicians of India*. 2005; 53:299–305. PMID: 15987016
  47. Haffner SM, Stern MP, Hazuda HP, Mitchell BD, Patterson JK. Cardiovascular risk factors in confirmed prediabetic individuals. Does the clock for coronary heart disease start ticking before the onset of clinical diabetes? *Jama*. 1990; 263(21):2893–8. <https://doi.org/10.1001/jama.263.21.2893> PMID: 2338751
  48. Gu K, Cowie CC, Harris MI. Mortality in adults with and without diabetes in a national cohort of the U.S. population, 1971–1993. *Diabetes care*. 1998; 21(7):1138–45. <https://doi.org/10.2337/diacare.21.7.1138> PMID: 9653609
  49. Loefflang MM, Deeks JJ, Gatsonis C, Bossuyt PM. Systematic reviews of diagnostic test accuracy. *Ann Intern Med*. 2008; 149(12):889–97. <https://doi.org/10.7326/0003-4819-149-12-200812160-00008> PMID: 19075208
  50. Cavagnoli G, Pimentel AL, Freitas PA, Gross JL, Camargo JL. Effect of ethnicity on HbA1c levels in individuals without diabetes: Systematic review and meta-analysis. *PloS one*. 2017; 12(2):e0171315. <https://doi.org/10.1371/journal.pone.0171315> PMID: 28192447
  51. Little RR, England JD, Wiedmeyer HM, McKenzie EM, Pettitt DJ, Knowler WC, et al. Relationship of glycosylated hemoglobin to oral glucose tolerance. Implications for diabetes screening. *Diabetes*. 1988; 37(1):60–4. <https://doi.org/10.2337/diab.37.1.60> PMID: 3335278
  52. Husseini A, Abdul-Rahim H, Awartani F, Giacaman R, Jervell J, Bjertness E. The utility of a single glucometer measurement of fasting capillary blood glucose in the prevalence determination of diabetes mellitus in an urban adult Palestinian population. *Scandinavian journal of clinical and laboratory investigation*. 2000; 60(6):457–62. <https://doi.org/10.1080/003655100448437> PMID: 11129061
  53. Rodríguez-Morán M, Guerrero-Romero F. Fasting plasma glucose diagnostic criterion, proposed by the American Diabetes Association, has low sensitivity for diagnoses of diabetes in Mexican population. *Journal of diabetes and its complications*. 2001; 15(4):171–3. [https://doi.org/10.1016/s1056-8727\(01\)00150-7](https://doi.org/10.1016/s1056-8727(01)00150-7) PMID: 11457667
  54. Daniel M, Rowley KG, O'Dea K. Fasting criteria for screening: test properties and agreement with glucose tolerance. *Diabetes research and clinical practice*. 2002; 58(2):139–48. [https://doi.org/10.1016/s0168-8227\(02\)00133-x](https://doi.org/10.1016/s0168-8227(02)00133-x) PMID: 12213356
  55. Nakagami T, Qiao Q, Tuomilehto J, Balkau B, Carstensen B, Tajima N, et al. The fasting plasma glucose cut-point predicting a diabetic 2-h OGTT glucose level depends on the phenotype. *Diabetes Res Clin Pract*. 2002; 55(1):35–43. [https://doi.org/10.1016/s0168-8227\(01\)00270-4](https://doi.org/10.1016/s0168-8227(01)00270-4) PMID: 11755477
  56. Al-Lawati JA, Barakat MN. Fasting cut-points in determining prevalence of diabetes in an Arab population of the Middle East. *Diabetes Res Clin Pract*. 2007; 75(2):241–5. <https://doi.org/10.1016/j.diabres.2006.06.018> PMID: 16875755
  57. Somannavar S, Ganesan A, Deepa M, Datta M, Mohan V. Random capillary blood glucose cut points for diabetes and pre-diabetes derived from community-based opportunistic screening in India. *Diabetes care*. 2009; 32(4):641–3. <https://doi.org/10.2337/dc08-0403> PMID: 19073758
  58. Araneta MR, Grandinetti A, Chang HK. A1C and diabetes diagnosis among Filipino Americans, Japanese Americans, and Native Hawaiians. *Diabetes care*. 2010; 33(12):2626–8. <https://doi.org/10.2337/dc10-0958> PMID: 20833866

59. Kramer CK, Araneta MR, Barrett-Connor E. A1C and diabetes diagnosis: The Rancho Bernardo Study. *Diabetes care*. 2010; 33(1):101–3. <https://doi.org/10.2337/dc09-1366> PMID: 19837792
60. van 't Riet E, Alssema M, Rijkelijhuizen JM, Kostense PJ, Nijpels G, Dekker JM. Relationship between A1C and glucose levels in the general Dutch population: the new Hoorn study. *Diabetes care*. 2010; 33(1):61–6. <https://doi.org/10.2337/dc09-0677> PMID: 19808928
61. Choi SH, Kim TH, Lim S, Park KS, Jang HC, Cho NH. Hemoglobin A1c as a diagnostic tool for diabetes screening and new-onset diabetes prediction: a 6-year community-based prospective study. *Diabetes care*. 2011; 34(4):944–9. <https://doi.org/10.2337/dc10-0644> PMID: 21335372
62. Zhao X, Zhao W, Zhang H, Li J, Shu Y, Li S, et al. Fasting capillary blood glucose: an appropriate measurement in screening for diabetes and pre-diabetes in low-resource rural settings. *Journal of endocrinological investigation*. 2013; 36(1):33–7. <https://doi.org/10.3275/8304> PMID: 22453076
63. Wu S, Yi F, Zhou C, Zhang M, Zhu Y, Tuniyazi Y, et al. HbA1c and the diagnosis of diabetes and prediabetes in a middle-aged and elderly Han population from northwest China (HbA1c). *Journal of diabetes*. 2013; 5(3):282–90. <https://doi.org/10.1111/1753-0407.12035> PMID: 23452328
64. Ma H, Gao X, Lin HD, Hu Y, Li XM, Gao J, et al. Glycated haemoglobin in diagnosis of diabetes mellitus and pre-diabetes among middle-aged and elderly population: Shanghai Changfeng study. *Biomedical and environmental sciences: BES*. 2013; 26(3):155–62. <https://doi.org/10.3967/0895-3988.2013.03.001> PMID: 23425797
65. Vlaar EM, Admiraal WM, Busschers WB, Holleman F, Nierkens V, Middelkoop BJ, et al. Screening South Asians for type 2 diabetes and prediabetes: (1) comparing oral glucose tolerance and haemoglobin A1c test results and (2) comparing the two sets of metabolic profiles of individuals diagnosed with these two tests. *BMC endocrine disorders*. 2013; 13:8. <https://doi.org/10.1186/1472-6823-13-8> PMID: 23442875
66. Liang K, Sun Y, Li WJ, Zhang XP, Li CQ, Yang WF, et al. Diagnostic efficiency of hemoglobin A1c for newly diagnosed diabetes and prediabetes in community-based Chinese adults aged 40 years or older. *Diabetes technology & therapeutics*. 2014; 16(12):853–7.
67. Huang J, Ou HY, Karnchanasorn R, Samoa R, Chuang LM, Chiu KC, et al. Clinical implication of fasting and post-challenged plasma glucose in diagnosis of diabetes mellitus. *Endocrine*. 2015; 48(2):511–8. <https://doi.org/10.1007/s12020-014-0301-3> PMID: 24895042
68. Aekplakorn W, Tantayotai V, Numsangkul S, Sripho W, Tatsato N, Burapasirawat T, et al. Detecting Prediabetes and Diabetes: Agreement between Fasting Plasma Glucose and Oral Glucose Tolerance Test in Thai Adults. *Journal of diabetes research*. 2015; 2015:396505. <https://doi.org/10.1155/2015/396505> PMID: 26347060
69. Zemlin AE, Matsha TE, Kengne AP, Erasmus RT. Derivation and validation of an HbA1c optimal cutoff for diagnosing prediabetes in a South African mixed ancestry population. *Clinica chimica acta; international journal of clinical chemistry*. 2015; 448:215–9.
70. Bao C, Zhang D, Sun B, Lan L, Cui W, Xu G, et al. Optimal cut-off points of fasting plasma glucose for two-step strategy in estimating prevalence and screening undiagnosed diabetes and pre-diabetes in Harbin, China. *PloS one*. 2015; 10(3):e0119510. <https://doi.org/10.1371/journal.pone.0119510> PMID: 25785585
71. Incani M, Sentinelli F, Perra L, Pani MG, Porcu M, Lenzi A, et al. Glycated hemoglobin for the diagnosis of diabetes and prediabetes: Diagnostic impact on obese and lean subjects, and phenotypic characterization. *Journal of diabetes investigation*. 2015; 6(1):44–50. <https://doi.org/10.1111/jdi.12241> PMID: 25621132
72. Aviles-Santa ML, Schneiderman N, Savage PJ, Kaplan RC, Teng Y, Perez CM, et al. IDENTIFYING PROBABLE DIABETES MELLITUS AMONG HISPANICS/LATINOS FROM FOUR U.S. CITIES: FINDINGS FROM THE HISPANIC COMMUNITY HEALTH STUDY/STUDY OF LATINOS. *Endocrine practice: official journal of the American College of Endocrinology and the American Association of Clinical Endocrinologists*. 2016; 22(10):1151–60. <https://doi.org/10.4158/EP151144.OR> PMID: 27295013
73. Karnchanasorn R, Huang J, Ou HY, Feng W, Chuang LM, Chiu KC, et al. Comparison of the Current Diagnostic Criterion of HbA1c with Fasting and 2-Hour Plasma Glucose Concentration. *Journal of diabetes research*. 2016; 2016:6195494. <https://doi.org/10.1155/2016/6195494> PMID: 27597979
74. Liu Y, Xiao X, Sun C, Tian S, Sun Z, Gao Y, et al. Ideal glycated hemoglobin cut-off points for screening diabetes and prediabetes in a Chinese population. *Journal of diabetes investigation*. 2016; 7(5):695–702. <https://doi.org/10.1111/jdi.12498> PMID: 27181567
75. Zou X, Li Y, Cai X, Zhang S, Zhang X, Han X, et al. Decreased Glycemic Difference Between Diabetes and Nondiabetes in the Elderly Leads to the Reduced Diagnostic Accuracy of Hemoglobin A1c for Diabetes Screening in an Aged Chinese Population. *Diabetes technology & therapeutics*. 2016; 18(4):226–32.

76. Herath HMM, Weerathna TP, Dahanayake MU, Weerasinghe NP. Use of HbA1c to diagnose type 2 diabetes mellitus among high risk Sri Lankan adults. *Diabetes & metabolic syndrome*. 2017; 11(4):251–5. <https://doi.org/10.1016/j.dsx.2016.08.021> PMID: 27623517
77. Wu L, Lin H, Gao J, Li X, Xia M, Wang D, et al. Effect of age on the diagnostic efficiency of HbA1c for diabetes in a Chinese middle-aged and elderly population: The Shanghai Changfeng Study. *PloS one*. 2017; 12(9):e0184607. <https://doi.org/10.1371/journal.pone.0184607> PMID: 28886160
78. Zhou X, Ruan X, Hao L, Zhou Y, Gu J, Qiu H, et al. Optimal hemoglobin A1C cutoff value for diabetes mellitus and pre-diabetes in Pudong New Area, Shanghai, China. *Primary care diabetes*. 2018; 12(3):238–44. <https://doi.org/10.1016/j.pcd.2017.12.006> PMID: 29370998
79. Lim WY, Ma S, Heng D, Tai ES, Khoo CM, Loh TP. Screening for diabetes with HbA1c: Test performance of HbA1c compared to fasting plasma glucose among Chinese, Malay and Indian community residents in Singapore. *Scientific reports*. 2018; 8(1):12419. <https://doi.org/10.1038/s41598-018-29998-z> PMID: 30127499
80. Prakashchandra R, Naidoo DP. Fasting Plasma Glucose and the HbA1c Are Not Optimal Screening Modalities for the Diagnosis of New Diabetes in Previously Undiagnosed Asian Indian Community Participants. *Ethnicity & disease*. 2018; 28(1):19–24. <https://doi.org/10.18865/ed.28.1.19> PMID: 29467562
81. Katulanda GW, Katulanda P, Dematapitiya C, Dissanayake HA, Wijeratne S, Sheriff MHR, et al. Plasma glucose in screening for diabetes and pre-diabetes: how much is too much? Analysis of fasting plasma glucose and oral glucose tolerance test in Sri Lankans. *BMC endocrine disorders*. 2019; 19(1):11. <https://doi.org/10.1186/s12902-019-0343-x> PMID: 30670002
